# Supplementary material for: Management of Donor-Specific Antibodies in Haploidentical Transplant: Multicenter Experience From the Madrid Group of Hematopoietic Transplant
Source: PubMed Central journal article supplement (PMC8170127; doi:10.3389/fimmu.2021.674658), 2021-05-19
Supplement: Table_1.pdf [file Table_1.pdf]

Supplementary Table 1. Management of DSA and results according to HLA class and intensity

|                     |           | Patient and transplant characteristics |              |                                   |                  | DSA                 |                        |            |                                                                                                        |                   |                      | Outcomes, complications and follow-up |                           |                                |                                 |                                             |                                |                         |            |
|---------------------|-----------|----------------------------------------|--------------|-----------------------------------|------------------|---------------------|------------------------|------------|--------------------------------------------------------------------------------------------------------|-------------------|----------------------|---------------------------------------|---------------------------|--------------------------------|---------------------------------|---------------------------------------------|--------------------------------|-------------------------|------------|
|                     |           | Patient                                | Indication   | Conditioning                      | Donor            | Highest initial MFI | C3d fixation available | Management | % Reduction (day 0)                                                                                    | MFI >5000 (day 0) | Increase after day 0 | Engraftment                           | Endothelial complications | Infection                      | Neurological events             | GVHD (II-IV / mod-severe)                   | Status                         | Follow up               |            |
| DSA Anti-MHC I      | MFI <5000 | Pt 1                                   | 54-y, female | AML, CR1                          | MAC (FluBux4)    | Male (son)          | 4500                   | No         | RTX x4 doses, IVIG x3 days                                                                             | 100               | No                   | No                                    | Yes                       | No                             | Yes (severe pneumonia)          | No                                          | SR-aGVHD IV (day 40)           | Dead (GVHD - infection) | 3,6 months |
|                     |           | Pt 2                                   | 50-y, female | AML, CR1                          | MAC (TBF3)       | Female (daughter)   | 2500                   | Yes (+)    | TPE x1 session                                                                                         | 100               | No                   | No                                    | Yes                       | No                             | No                              | No                                          | No                             | Alive                   | 41 months  |
|                     |           | Pt 3                                   | 56-y, female | AML, CR1                          | MAC (FluBux4)    | Male (son)          | 2700                   | No         | Incompatible platelets                                                                                 | Unknown           | Unknown              | Unknown                               | Yes                       | No                             | No                              | No                                          | No                             | Alive                   | 10 months  |
|                     |           | Pt 4                                   | 61-y, female | NHL, CR (previous auto-HSCT)      | RIC (Bux2)       | Female (daughter)   | 3400                   | No         | RTX x1 dose, IVIG x3 days, TPE x5                                                                      | 100               | No                   | No                                    | Yes                       | No                             | Yes (bacteriemia)               | No                                          | No                             | Alive                   | 10 months  |
|                     | MFI ≥5000 | Pt 5                                   | 49-y, female | AML, CR1                          | MAC (FluBux4)    | Female (sister)     | 9000                   | No         | RTX x2 doses, IVIG x5 days, MMF x2 weeks, incompatible platelets                                       | 20                | Yes (7500 MFI)       | No                                    | Yes                       | No                             | No                              | Yes (posterior cord myelitis, CMV related?) | aGVHD II (CR) + mod cGVHD (CR) | Alive                   | 44 months  |
|                     |           | Pt 6                                   | 41-y, female | ALL, CR2 (previous allo-HSCT MSD) | RIC (Bux2)       | Male (son)          | 14000                  | No         | RTX x3 doses, IVIG x5 days, MMF x3 weeks, TPE x3 sessions, incompatible platelets                      | 85                | No                   | No                                    | Yes                       | Mild SOS (previous inotuzumab) | Yes (bacteriemia)               | Yes (demyelinating polyneuropathy)          | No                             | Alive                   | 25 months  |
|                     |           | Pt 7                                   | 60-y, female | Sézary syndrome, SD               | RIC (Bux2)       | Male (son)          | 5000                   | No         | RTX x4 doses, IVIG x4 days, MMF x2 weeks, TPE x2 sessions, incompatible platelets                      | 100               | No                   | No                                    | Yes                       | No                             | No                              | No                                          | aGVHD II (CR)                  | Dead (relapse)          | 18 months  |
|                     |           | Pt 8                                   | 60-y, female | HR-MDS, CR                        | RIC (Bux2)       | Male (son)          | 5500                   | Yes (+)    | RTX x4 doses, IVIG x4 doses, Dexa 40 x4 days, MMF/FK x2 weeks, TPE x2 sessions, incompatible platelets | 100               | No                   | No                                    | No (early death)          | No                             | Yes (bacteriemia)               | No                                          | No                             | Dead (infection)        | 0,7 month  |
|                     |           | Pt 9                                   | 63-y, female | HR-MDS, CR                        | MAC (FluBux3)    | Male (brother)      | 14000                  | Yes (+)    | RTX x3 doses, IVIG x5 days, MMF/FK x4 weeks, TPE x5 sessions, incompatible platelets                   | 82                | No (2500 MFI)        | Yes: increase up to >5000             | No (2nd HSCT)             | No                             | Yes (multiple bacteriemia)      | No                                          | No (censored)                  | Dead (after 2nd HSCT)   | 6 months   |
|                     |           | Pt 10                                  | 41-y, female | ALL, CR1                          | MAC (FluBux4)    | Male (brother)      | 11000                  | No         | RTX x2 doses, IVIG x5 days, MMF/FK x4 weeks, TPE x5 sessions                                           | 100               | No                   | No                                    | Yes                       | No                             | No                              | No                                          | No                             | Alive                   | 2 months   |
| DSA Anti-MHC II     | MFI <5000 | Pt 11                                  | 53-y, female | HL (previous allo-HSCT haplo)     | RIC (Bux1)       | Male (son)          | 3500                   | No         | RTX x3 doses, IVIG x5 days, MMF x2 weeks, FK x5 days                                                   | 50                | No                   | No                                    | Yes                       | No                             | No                              | No                                          | Moderate cGVHD (PR)            | Alive (relapsed)        | 25 months  |
|                     |           | Pt 12                                  | 56-y, female | AML, CR1                          | MAC (FluBux4)    | Female (daughter)   | 3700                   | No         | RTX x1 dose, buffy coat                                                                                | 25                | No                   | No                                    | Yes                       | No                             | Yes (invasive fungal infection) | No                                          | No                             | Alive                   | 6 months   |
|                     |           | Pt 13                                  | 66-y, male   | HR-MDS, CR                        | RIC (Bux2)       | Male (son)          | 4000                   | No         | RTX x1 dose, buffy coat                                                                                | 25                | No                   | No                                    | Yes                       | No                             | No                              | No                                          | No                             | Alive                   | 5 months   |
|                     | MFI ≥5000 | Pt 14                                  | 53-y, female | ALL, CR1                          | MAC (TBI-Cy)     | Male (son)          | 13000                  | No         | RTX x4 doses, TPE x2 sessions, MMF/FK x4 weeks                                                         | 40                | Yes (5500 MFI)       | No                                    | Yes                       | No                             | No                              | No                                          | No                             | Alive                   | 3 months   |
| DSA Anti-MHC I + II | MFI ≥5000 | Pt 15                                  | 57-y, female | ATCL (HTLV1), CR                  | RIC (Bux1)       | Male (son)          | 11000 (HLA-I <5000)    | Yes (+)    | RTX x3 doses, IVIG x5 days, MMF x3 weeks, FK x5 days, TPE x4 sessions, buffy coat                      | 100               | No                   | No                                    | Yes                       | No                             | No                              | Yes (posterior cord myelitis, CMV related?) | No                             | Alive                   | 22 months  |
|                     |           | Pt 16                                  | 42-y, female | IS-refractory Aplastic anemia     | RIC (Bux2) + ATG | Male (brother)      | 11000                  | Yes (+)    | RTX x4 doses, IVIG x5 days, MMF x3 weeks, TPE x3 sessions, incompatible platelets, buffy coat          | 80                | No                   | No                                    | Yes                       | Yes (TA-TMA)                   | Yes (bacteriemia)               | No                                          | No                             | Dead (TA-TMA)           | 3,5 months |
|                     |           | Pt 17                                  | 38-y, female | AML, CR1                          | MAC (FluBux4)    | Female (cousin)     | 14000                  | Yes (+)    | RTX x6 doses, IVIG x5 days, MMF x3 weeks, incompatible platelets, buffy coat                           | 100               | No                   | No                                    | Yes                       | Yes (severe SOS)               | No                              | Yes (non-filleted intracranial HT)          | No                             | Dead (SOS)              | 1 month    |
|                     |           | Pt 18                                  | 69-y, female | AML, CR1                          | RIC (Bux2)       | Male (son)          | 7000 (HLA-I <5000)     | No         | RTX x1 dose, buffy coat                                                                                | 100               | No                   | No                                    | Yes                       | Yes (TA-TMA)                   | No                              | No                                          | No                             | Alive                   | 3 months   |
|                     |           | Pt 19                                  | 63-y, female | AML, CR1                          | MAC (FluBux3)    | Female (daughter)   | 25000                  | No         | RTX x6 doses, IVIG x10 days, MMF x2 weeks, TPE x10 sessions, incompatible platelets                    | 100               | No                   | No                                    | Yes                       | No                             | Yes (necrotizing fasciitis)     | No                                          | No                             | Alive                   | 7 months   |
